# Supplementary material for: Sugar-Sweetened Beverages, Foods of Low Nutritional Value, and Child Undernutrition in Cambodia
Source: MDPI journal article supplement (doi:10.3390/ijerph21020169), 2024-02-01
Supplement: s1 [file s1]

## 2 year evaluation form (control and intervention groups)

General information

Date of interview:

|                                   |      |                              |
|-----------------------------------|------|------------------------------|
| Name of Health Centre:            |      | ID number:                   |
| Name of provider (nurse/midwife): |      | ID number:                   |
| Name of baby:                     |      | ID number:                   |
| Date of birth (baby):             |      | Sex: Male ..... Female ..... |
| Mother's name:                    | Age: | Phone number:                |
| Father's name:                    | Age: | Phone number:                |
| Name of grandmother:              |      | Phone number:                |
| Name of chief of village:         |      | Phone number:                |

### The first questions relate to self-reported oral health of the mother

|                                                                                           |            |                              |
|-------------------------------------------------------------------------------------------|------------|------------------------------|
| Did you brush your teeth yesterday?                                                       | Yes        | No                           |
| Did you use toothpaste with fluoride?                                                     | Yes        | No                           |
| Please rate your oral health :                                                            |            |                              |
| How much do your mouth and teeth bother you?                                              |            |                              |
| How often have you experienced problems with your mouth, teeth or jaws in the last month? | Never      | Once or twice                |
|                                                                                           | Every week | Every day or almost everyday |

### Socioeconomic description of the mother

|                                                |              |                  |             |                  |
|------------------------------------------------|--------------|------------------|-------------|------------------|
| What is your highest level of education?       | Illiterate   | Primary          | Secondary   | Tertiary         |
| What is the monthly income in your house hold? | <\$50        | \$51-150         | \$151-250   | >\$250           |
| What is your occupation?                       | Home duties  | Business selling | Farming     | Government staff |
|                                                | NGO          | Other            |             |                  |
| What is the occupation of the Father?          | Home duties  | Business selling | Farming     | Government staff |
|                                                | NGO          | Other            |             |                  |
| How many people live in your house?            | ..... people |                  |             |                  |
| Does your house have running water?            | Yes          |                  |             | No               |
| Does your house have electricity?              | Yes          |                  |             | No               |
| What do you use to cook with?                  | Wood         | Gas              | Combination | other            |

| Oral Health literacy                                                                                |                                                                                                                                         |    |                            |
|-----------------------------------------------------------------------------------------------------|-----------------------------------------------------------------------------------------------------------------------------------------|----|----------------------------|
| How important are baby teeth?                                                                       |                                                                                                                                         |    |                            |
| Is there anything that you can do to prevent the primary teeth from breaking down with tooth decay? | Yes                                                                                                                                     | No | Don't Know                 |
| If yes then what can you do?                                                                        | Brush teeth                                                                                                                             |    | Go to the dentist          |
|                                                                                                     | Use tooth paste                                                                                                                         |    | Avoid sweet food and drink |
|                                                                                                     | Other:                                                                                                                                  |    |                            |
| What do you think is the cause of dental caries on the teeth?                                       | Sugar                                                                                                                                   |    | Bacteria                   |
|                                                                                                     | Inherited/genetic                                                                                                                       |    | Poor oral hygiene          |
|                                                                                                     | Other                                                                                                                                   |    |                            |
| Did you notice whether your child has any white spots on their teeth?                               | Yes                                                                                                                                     | No | Don't know                 |
| How healthy do you think your child's teeth will be when they go to school?                         | Likely to be healthy ← → Likely to have a problem<br> |    |                            |
| How likely do you think it will be that your child has a tooth ache in the next year?               | High chance ← → Low chance<br>                        |    |                            |
| How important are the primary teeth?                                                                | Not so important → Very important<br>                 |    |                            |

### Nursing and feeding practices

|                                                                                      | During the morning | During the middle of the day | During the afternoon | During the evening | During the night |
|--------------------------------------------------------------------------------------|--------------------|------------------------------|----------------------|--------------------|------------------|
| How many times did you breastfeed yesterday?                                         |                    |                              |                      |                    |                  |
| <b>How many times did your baby have the following things in a bottle yesterday?</b> |                    |                              |                      |                    |                  |
| Milk formula                                                                         |                    |                              |                      |                    |                  |
| Rice Porridge                                                                        |                    |                              |                      |                    |                  |
| Soya Milk                                                                            |                    |                              |                      |                    |                  |
| Condensed milk                                                                       |                    |                              |                      |                    |                  |
| Fruit juice or another sweet drink                                                   |                    |                              |                      |                    |                  |
| Water                                                                                |                    |                              |                      |                    |                  |
| <b>How many times yesterday did your baby eat the following food:</b>                |                    |                              |                      |                    |                  |
| Rice porridge                                                                        |                    |                              |                      |                    |                  |
| Meat                                                                                 |                    |                              |                      |                    |                  |
| Fruits                                                                               |                    |                              |                      |                    |                  |
| Egg                                                                                  |                    |                              |                      |                    |                  |
| Vegetable                                                                            |                    |                              |                      |                    |                  |
| Khmer sweet cakes                                                                    |                    |                              |                      |                    |                  |
| Packaged sweets                                                                      |                    |                              |                      |                    |                  |
| Packaged snacks                                                                      |                    |                              |                      |                    |                  |

When did you or someone in your family first give your baby the following foods

|                                    | 3<br>months | 6<br>months | 9<br>months | 12<br>months | 15<br>months | 18<br>months | 24<br>months |
|------------------------------------|-------------|-------------|-------------|--------------|--------------|--------------|--------------|
| Milk formula                       |             |             |             |              |              |              |              |
| Rice Porridge                      |             |             |             |              |              |              |              |
| Soya Milk                          |             |             |             |              |              |              |              |
| Condensed milk                     |             |             |             |              |              |              |              |
| Fruit juice or another sweet drink |             |             |             |              |              |              |              |
| Water                              |             |             |             |              |              |              |              |
| Rice porridge                      |             |             |             |              |              |              |              |
| Meat                               |             |             |             |              |              |              |              |
| Fruits                             |             |             |             |              |              |              |              |
| Egg                                |             |             |             |              |              |              |              |
| Vegetable                          |             |             |             |              |              |              |              |
| Khmer sweet cakes                  |             |             |             |              |              |              |              |
| Packaged sweets                    |             |             |             |              |              |              |              |
| Packaged snacks                    |             |             |             |              |              |              |              |

|                                                               |                                                                                                                     |
|---------------------------------------------------------------|---------------------------------------------------------------------------------------------------------------------|
| <b>Other Health problems:</b>                                 |                                                                                                                     |
| How would you rate the over-all health of your child?         | <div> <div>Excellent</div> <div> <div></div> <div></div> <div></div> </div> <div>My child is often ill</div> </div> |
| Was your child born at full term or born early (pre-term)?    |                                                                                                                     |
| During the last month has your child had any of the following | Chest infection/coughing/difficulty breathing                                                                       |
|                                                               | Admitted to hospital                                                                                                |
|                                                               | Diarrhoea (more than 3 days)                                                                                        |
|                                                               | Taking any antibiotics?                                                                                             |
| What do you do when your child is upset?                      | Hug them or sooth them with words                                                                                   |
|                                                               | Play a game with them                                                                                               |
|                                                               | Give them something sweet to eat                                                                                    |
|                                                               | Other:                                                                                                              |

| <b>Family Impact Score:</b> During the last 3 months, because of your child's teeth, lips, mouth or jaws, how often have you or another family member: |                                   |                                           |                                       |                                   |                                        |
|--------------------------------------------------------------------------------------------------------------------------------------------------------|-----------------------------------|-------------------------------------------|---------------------------------------|-----------------------------------|----------------------------------------|
| Been upset?                                                                                                                                            | Never<br><input type="checkbox"/> | Once or twice<br><input type="checkbox"/> | Sometimes<br><input type="checkbox"/> | Often<br><input type="checkbox"/> | Don't Know<br><input type="checkbox"/> |
| Felt guilty?                                                                                                                                           | Never<br><input type="checkbox"/> | Once or twice<br><input type="checkbox"/> | Sometimes<br><input type="checkbox"/> | Often<br><input type="checkbox"/> | Don't Know<br><input type="checkbox"/> |
| Had your sleep disrupted?                                                                                                                              | Never<br><input type="checkbox"/> | Once or twice<br><input type="checkbox"/> | Sometimes<br><input type="checkbox"/> | Often<br><input type="checkbox"/> | Don't Know<br><input type="checkbox"/> |
| Taken time off work (e.g. due to pain, appointments, treatment)?                                                                                       | Never<br><input type="checkbox"/> | Once or twice<br><input type="checkbox"/> | Sometimes<br><input type="checkbox"/> | Often<br><input type="checkbox"/> | Don't Know<br><input type="checkbox"/> |
| Had less time for yourself or your family?                                                                                                             | Never<br><input type="checkbox"/> | Once or twice<br><input type="checkbox"/> | Sometimes<br><input type="checkbox"/> | Often<br><input type="checkbox"/> | Don't Know<br><input type="checkbox"/> |
| Blamed yourself or another person in your family?                                                                                                      | Never<br><input type="checkbox"/> | Once or twice<br><input type="checkbox"/> | Sometimes<br><input type="checkbox"/> | Often<br><input type="checkbox"/> | Don't Know<br><input type="checkbox"/> |
| Argued with your child or other members in your family?                                                                                                | Never<br><input type="checkbox"/> | Once or twice<br><input type="checkbox"/> | Sometimes<br><input type="checkbox"/> | Often<br><input type="checkbox"/> | Don't Know<br><input type="checkbox"/> |
