# Supplementary material for: Sugar-Sweetened Beverages, Foods of Low Nutritional Value, and Child Undernutrition in Cambodia
Source: MDPI journal article supplement (doi:10.3390/ijerph21020169), 2024-02-01
Supplement: s1 [file s1]

**Table S1.** Association between flavored sugary drinks and foods of low nutritional value consumed on the previous day and stunting at 24 months stratified by original Cambodia SMILE study group assignment<sup>†</sup>

| Exposure Variable                               | Intervention Group |             |                 | Control Group |             |                 |
|-------------------------------------------------|--------------------|-------------|-----------------|---------------|-------------|-----------------|
|                                                 | OR                 | [95% CI]    | <i>p</i> -value | OR            | [95% CI]    | <i>p</i> -value |
| Any flavored sugary drinks <sup>‡</sup>         | 1.12               | [0.54-2.35] | 0.76            | 4.03          | [1.79-9.07] | 0.001           |
| Any FLNV <sup>‡</sup>                           | 0.78               | [0.39-1.60] | 0.50            | 1.18          | [0.45-3.10] | 0.74            |
| Number of FLNV on previous day                  |                    |             |                 |               |             |                 |
| 1                                               | 1.11               | [0.48-2.56] | 0.80            | 1.11          | [0.37-3.36] | 0.85            |
| 2                                               | 1.04               | [0.40-2.70] | 0.94            | 0.96          | [0.32-2.92] | 0.95            |
| 3 or more                                       | 0.34               | [0.13-0.90] | 0.03            | 1.37          | [0.45-4.11] | 0.58            |
| Any packaged salty snacks                       | 0.50               | [0.26-0.98] | 0.04            | 0.91          | [0.46-1.83] | 0.80            |
| Number of packaged salty snacks on previous day |                    |             |                 |               |             |                 |
| 1                                               | 0.56               | [0.27-1.16] | 0.12            | 0.93          | [0.43-2.00] | 0.85            |
| 2 or more                                       | 0.37               | [0.14-0.96] | 0.04            | 0.88          | [0.34-2.23] | 0.78            |
| Any packaged sweets                             | 0.65               | [0.32-1.32] | 0.23            | 1.58          | [0.77-3.24] | 0.21            |
| Number of packaged sweets on previous day       |                    |             |                 |               |             |                 |
| 1                                               | 0.91               | [0.37-2.23] | 0.83            | 1.76          | [0.72-4.31] | 0.22            |
| 2 or more                                       | 0.42               | [0.15-1.17] | 0.10            | 1.40          | [0.54-3.60] | 0.49            |

<sup>†</sup>Odds ratios generated using multivariate logistic regression; adjusted for child sex, household income, mother's occupation; N = 175 (Intervention Group), N = 155-157 (Control Group)

<sup>‡</sup>Flavored sugary drinks include fruit juice, soda, and syrups; Foods of Low Nutritional Value (FLNV) include packaged salty snacks, packaged sweets, and Khmer sweet cake

**Table S2.** Association between flavored sugary drinks and foods of low nutritional value consumed on the previous day and wasting at 24 months stratified by original Cambodia SMILE study group assignment<sup>†</sup>

| Exposure Variable                               | Intervention Group |             |                 | Control Group |             |                 |
|-------------------------------------------------|--------------------|-------------|-----------------|---------------|-------------|-----------------|
|                                                 | OR                 | [95% CI]    | <i>p</i> -value | OR            | [95% CI]    | <i>p</i> -value |
| Any flavored sugary drinks <sup>‡</sup>         | 2.39               | [1.13-5.04] | 0.02            | 1.89          | [0.65-5.54] | 0.25            |
| Any FLNV <sup>‡</sup>                           | 1.98               | [0.85-4.62] | 0.12            | 1.21          | [0.26-5.66] | 0.81            |
| Number of FLNV on previous day                  |                    |             |                 |               |             |                 |
| 1                                               | 1.70               | [0.64-4.49] | 0.29            | 1.76          | [0.33-9.40] | 0.51            |
| 2                                               | 3.40               | [1.23-9.39] | 0.02            | 1.43          | [0.26-7.94] | 0.68            |
| 3 or more                                       | 1.34               | [0.44-4.09] | 0.61            | 0.67          | [0.10-4.25] | 0.67            |
| Any packaged salty snacks                       | 2.30               | [1.07-4.95] | 0.03            | 0.45          | [0.16-1.28] | 0.14            |
| Number of packaged salty snacks on previous day |                    |             |                 |               |             |                 |
| 1                                               | 2.84               | [1.27-6.33] | 0.01            | 0.30          | [0.08-1.17] | 0.08            |
| 2 or more                                       | 1.31               | [0.44-3.91] | 0.63            | 0.72          | [0.21-2.51] | 0.61            |
| Any packaged sweets                             | 1.18               | [0.56-2.51] | 0.66            | 1.39          | [0.49-3.94] | 0.53            |
| Number of packaged sweets on previous day       |                    |             |                 |               |             |                 |
| 1                                               | 2.02               | [0.84-4.87] | 0.12            | 2.57          | [0.84-7.84] | 0.10            |
| 2 or more                                       | 0.50               | [0.14-1.78] | 0.28            | 0.37          | [0.05-3.06] | 0.36            |

<sup>†</sup>Odds ratios generated using multivariate logistic regression; not adjusted; N = 183 (Intervention Group), N = 177-179 (Control Group)

<sup>‡</sup>Flavored sugary drinks include fruit juice, soda, and syrups; Foods of Low Nutritional Value (FLNV) include packaged salty snacks, packaged sweets, and Khmer sweet cake
